# Supplementary material
Source: PubMed Central journal article supplement (PMC5091937)

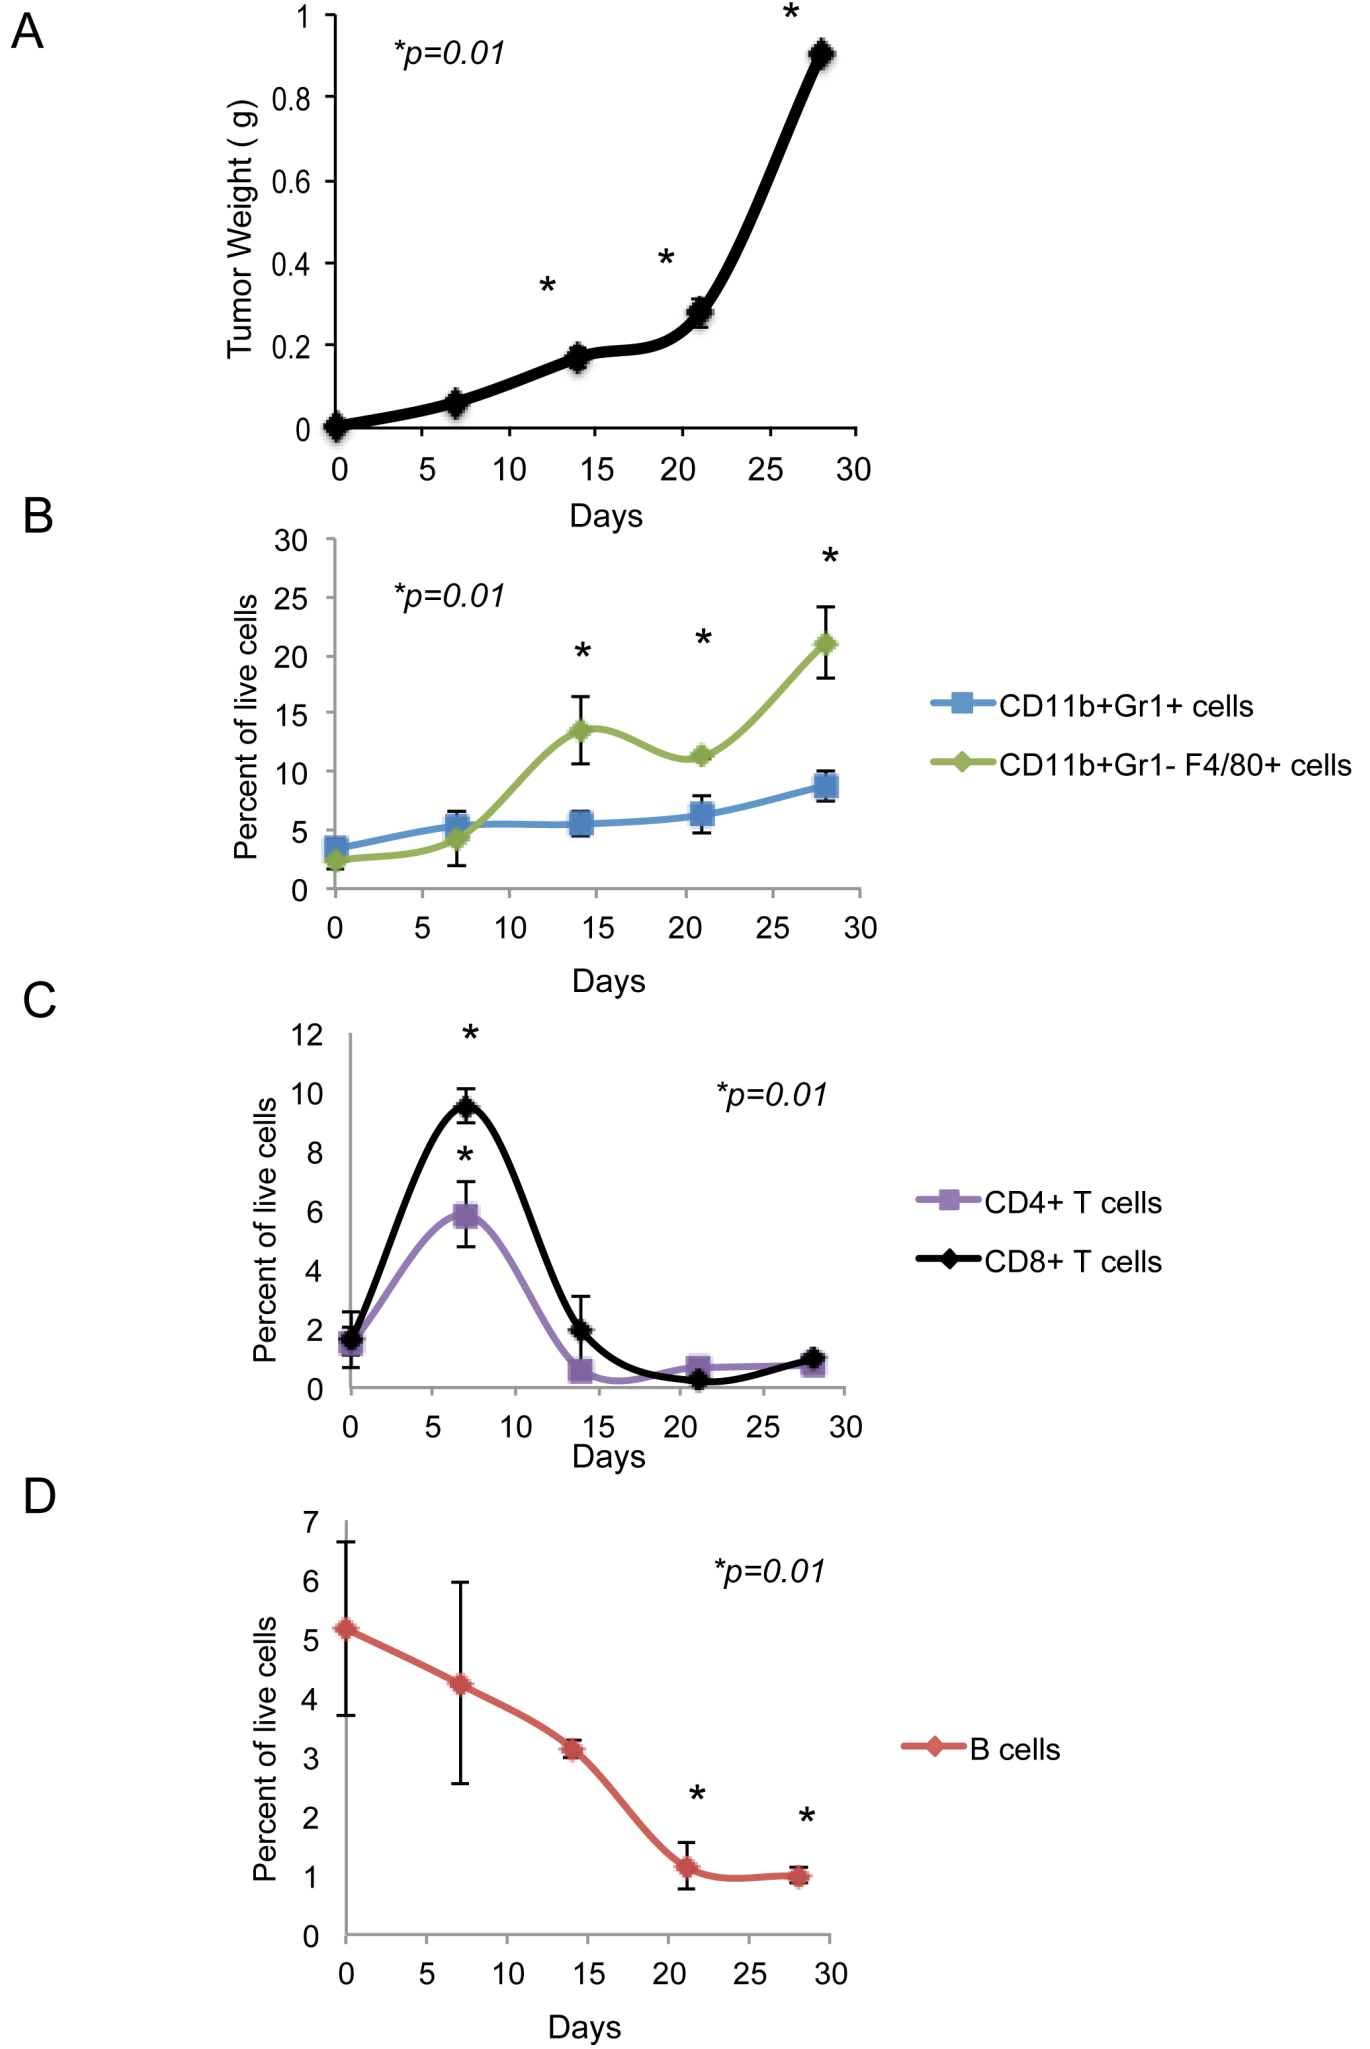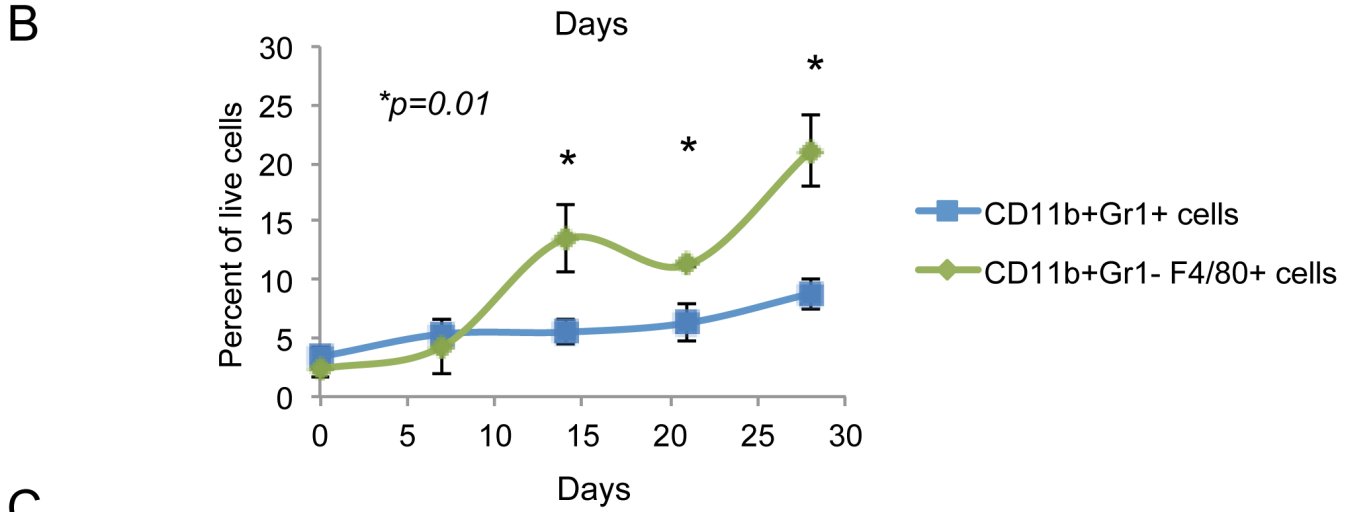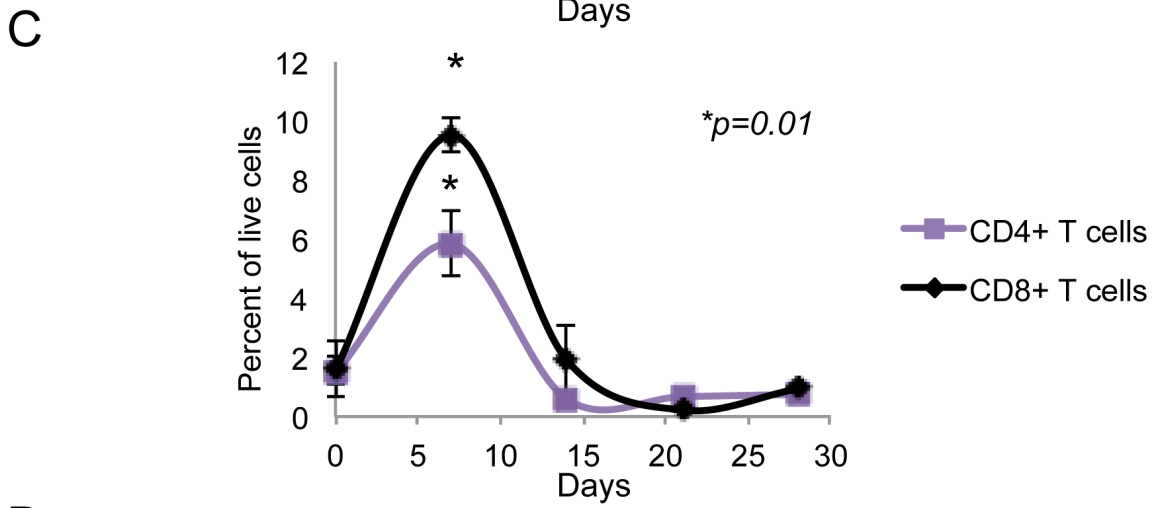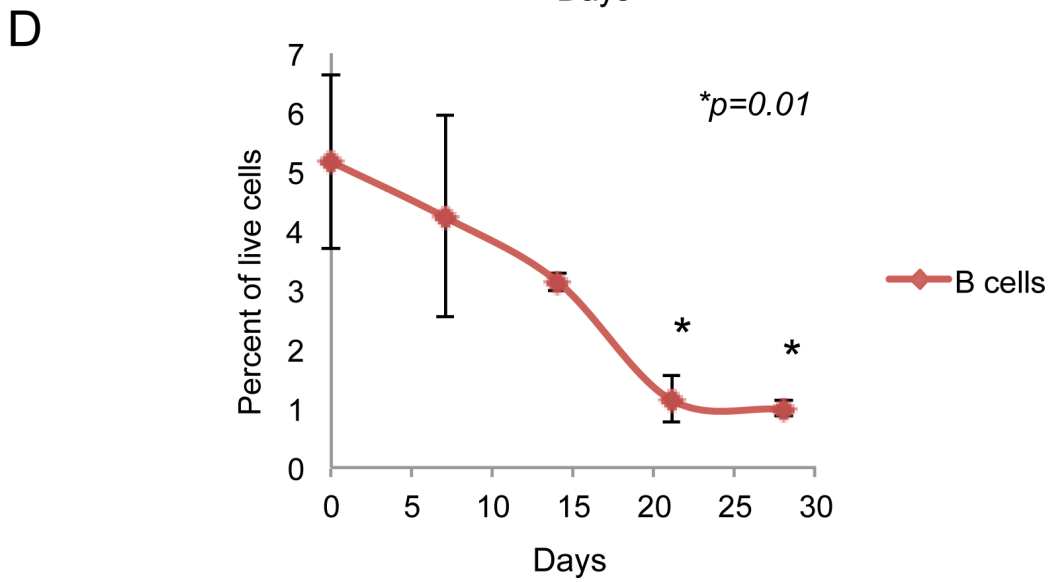

Supplement: NIHMS791787-supplement-2.pdf [file NIHMS791787-supplement-2.pdf]

# Supplementary Figure 2

A

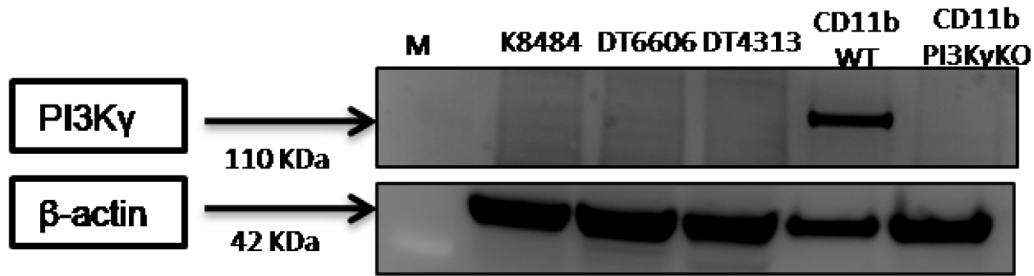

B

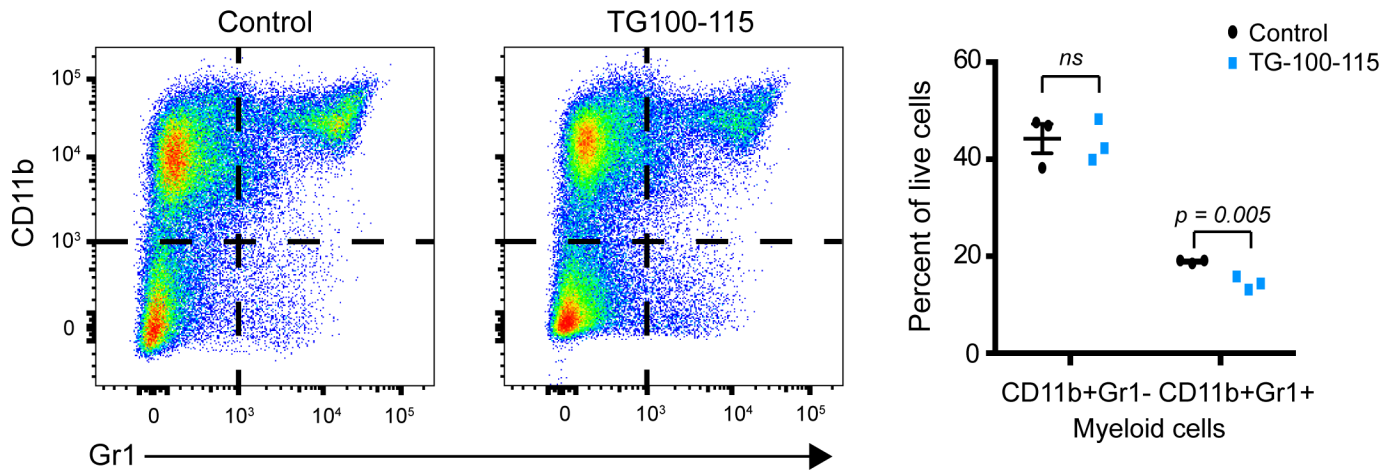

C

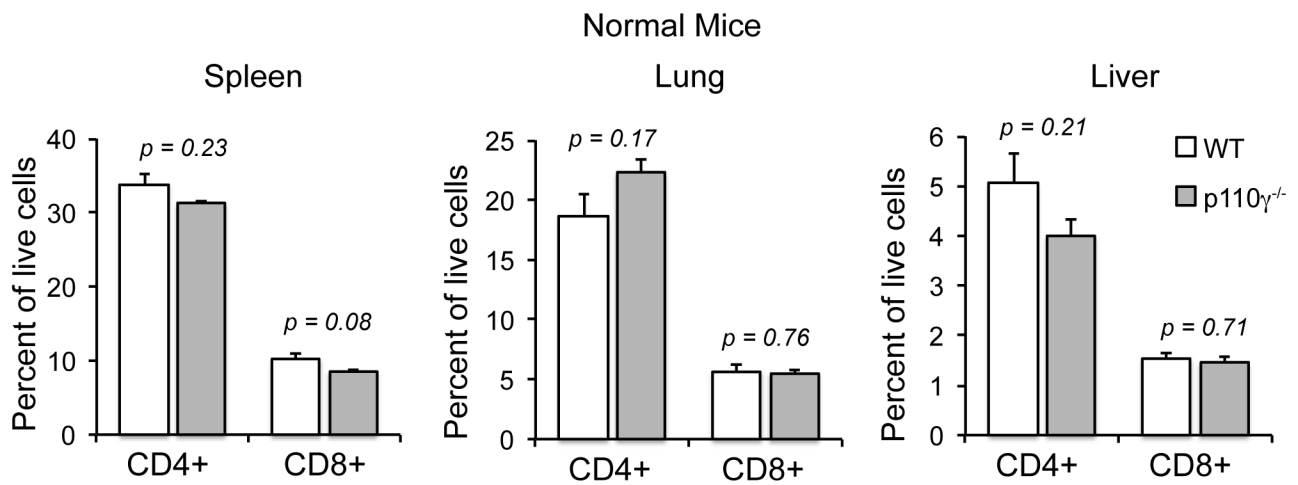

D

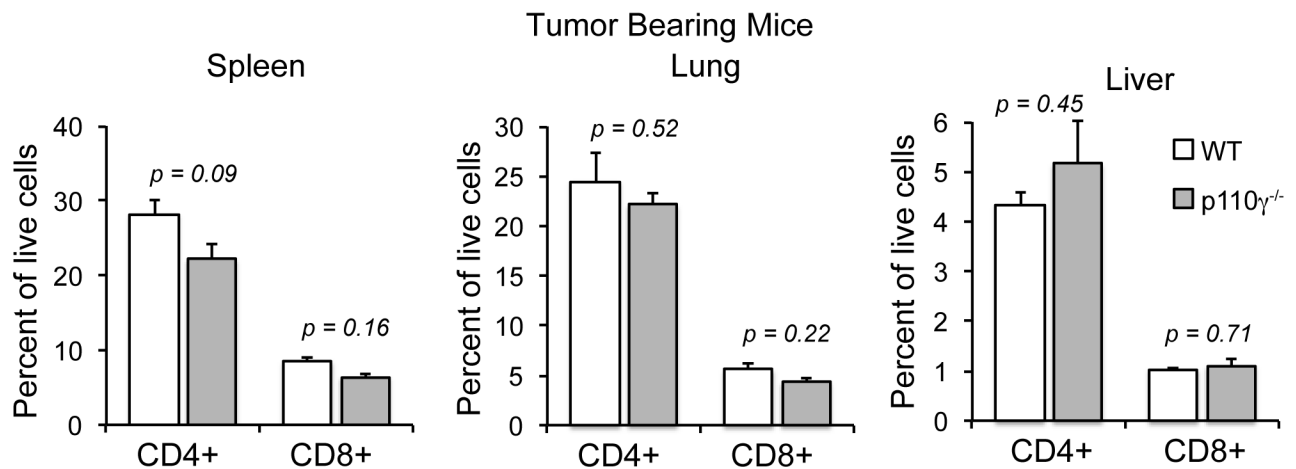

Supplement: NIHMS791787-supplement-3.pdf [file NIHMS791787-supplement-3.pdf]

A

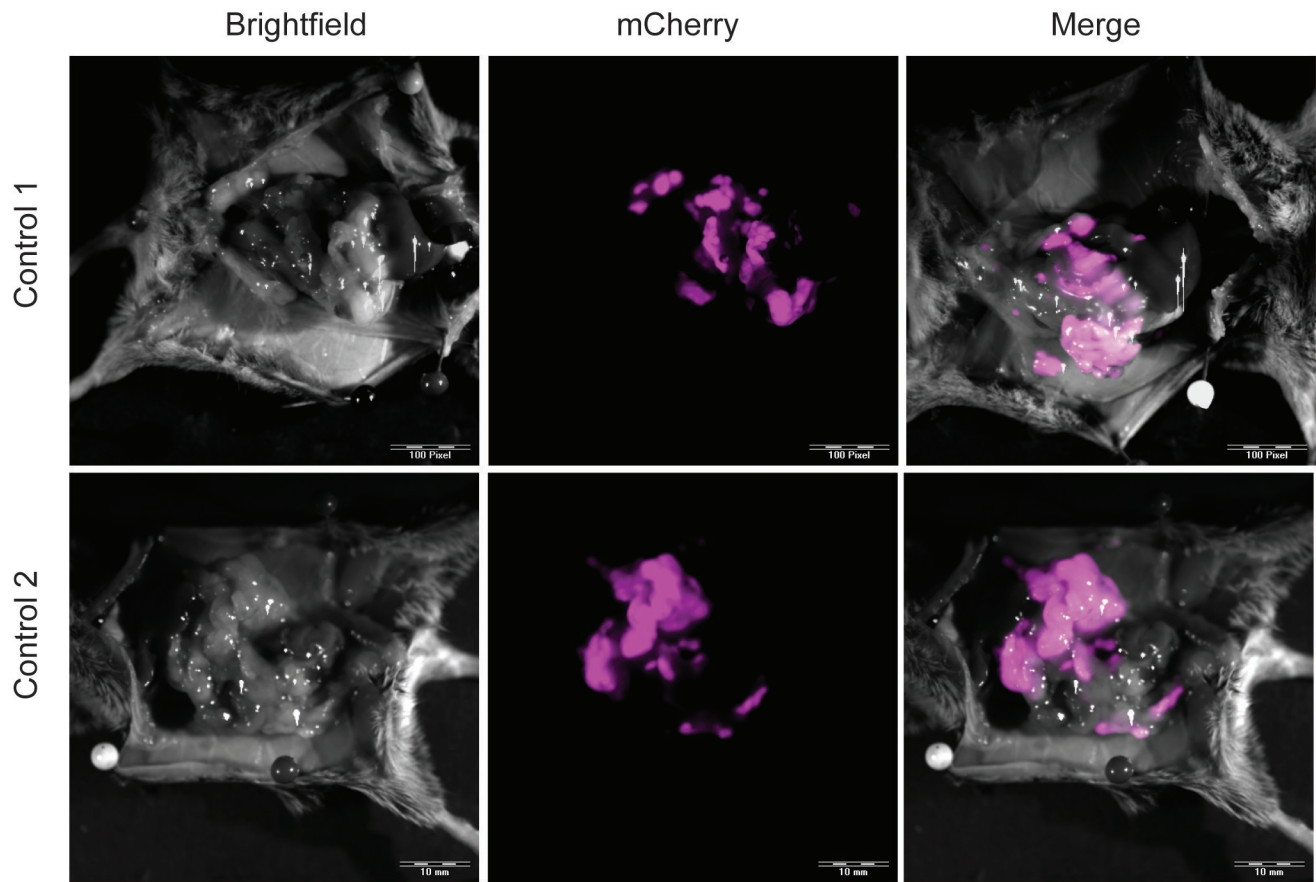

B

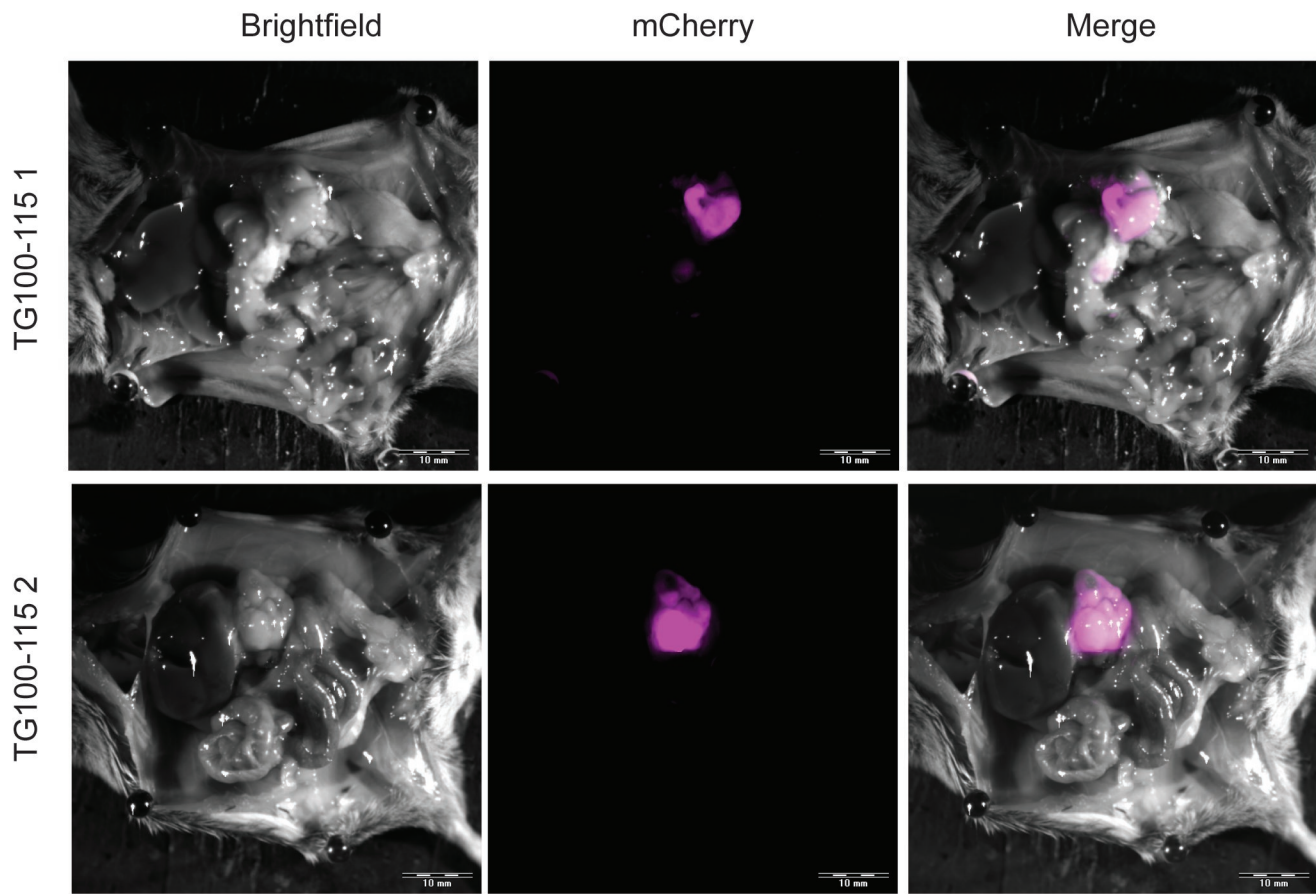

Supplement: NIHMS791787-supplement-4.pdf [file NIHMS791787-supplement-4.pdf]

## Supplementary Figure 4

A

### p53 2.1.1 Orthotopic PDAC

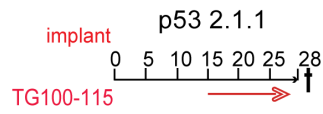

B

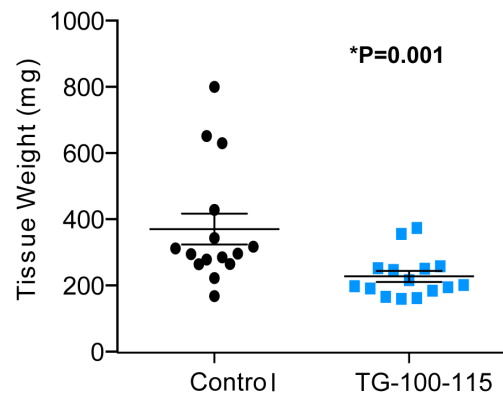

C

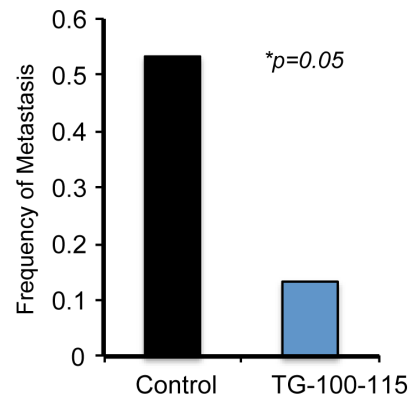

D

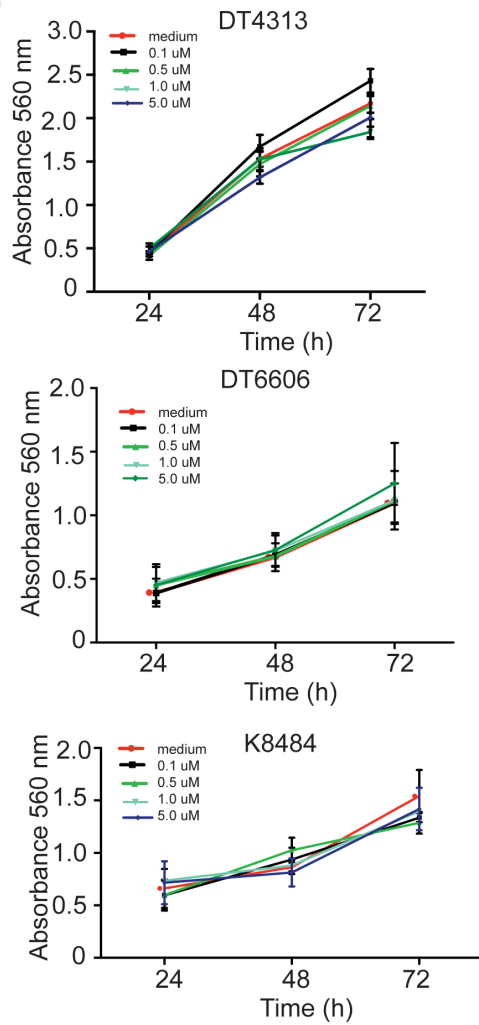

E

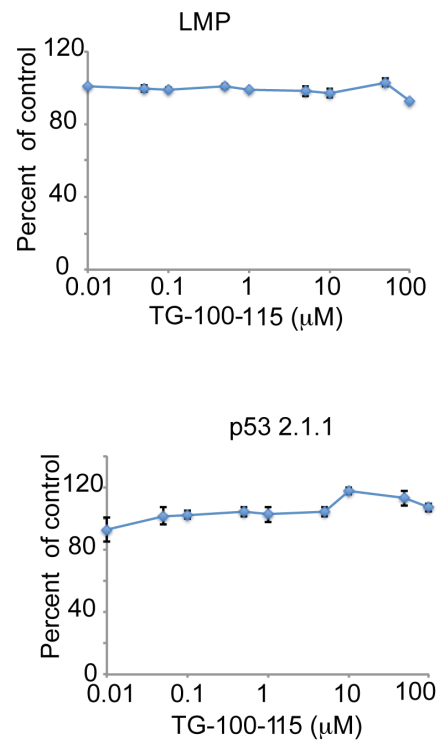

Supplement: NIHMS791787-supplement-5.pdf [file NIHMS791787-supplement-5.pdf]

# Supplementary Figure 5

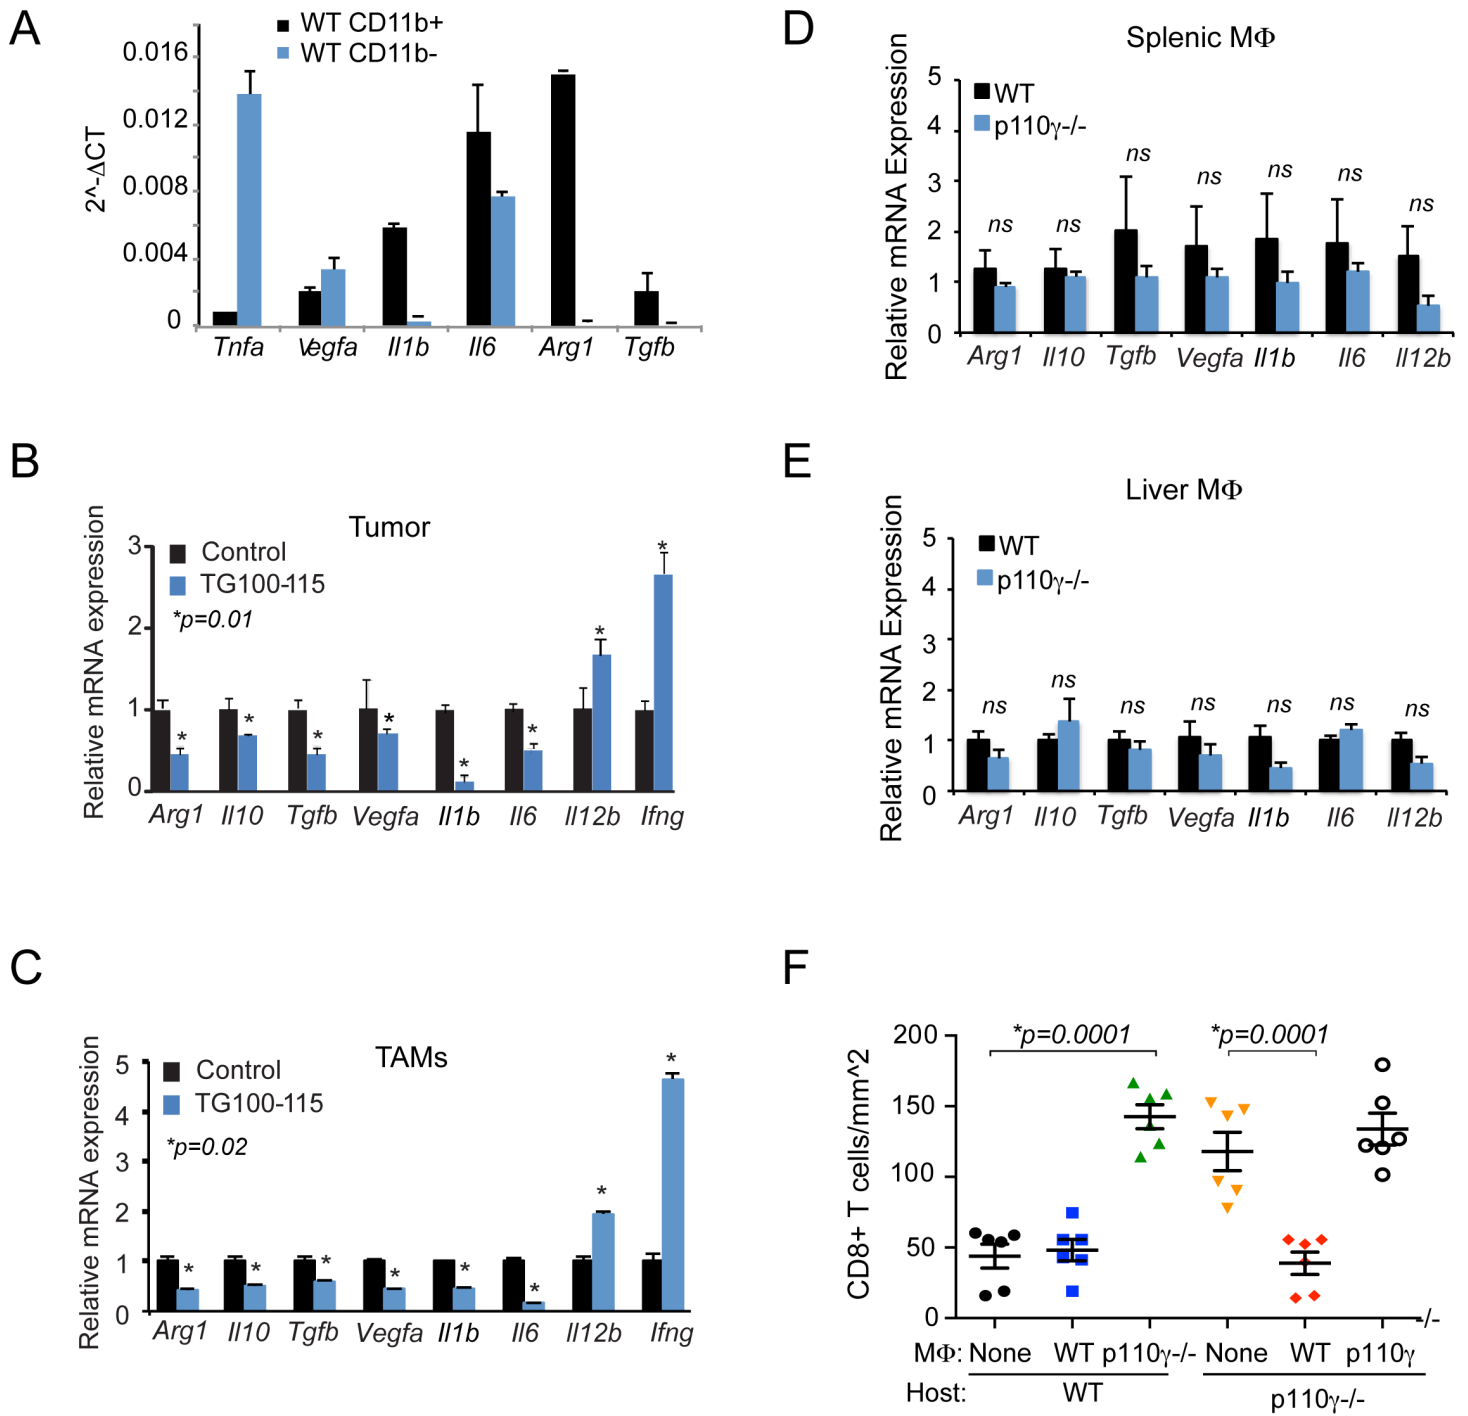

Supplement: NIHMS791787-supplement-6.pdf [file NIHMS791787-supplement-6.pdf]

# Supplementary Figure 6

**A**

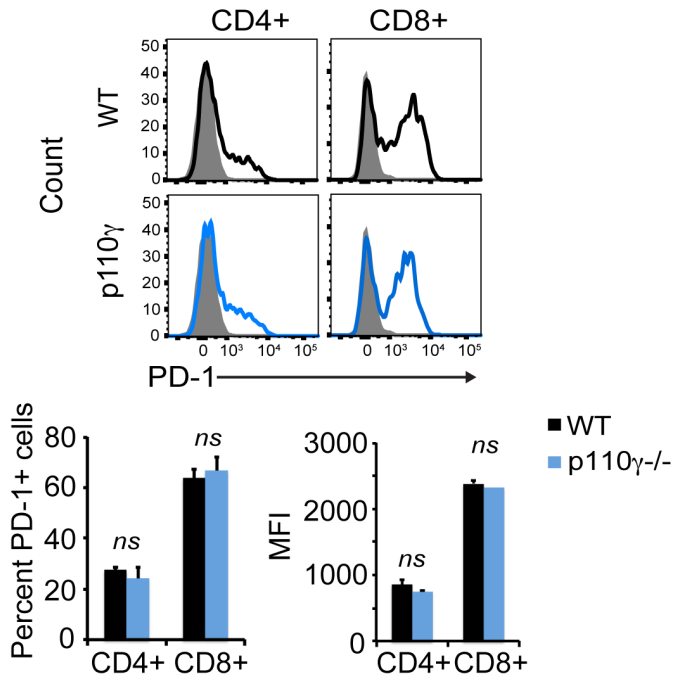

**B**

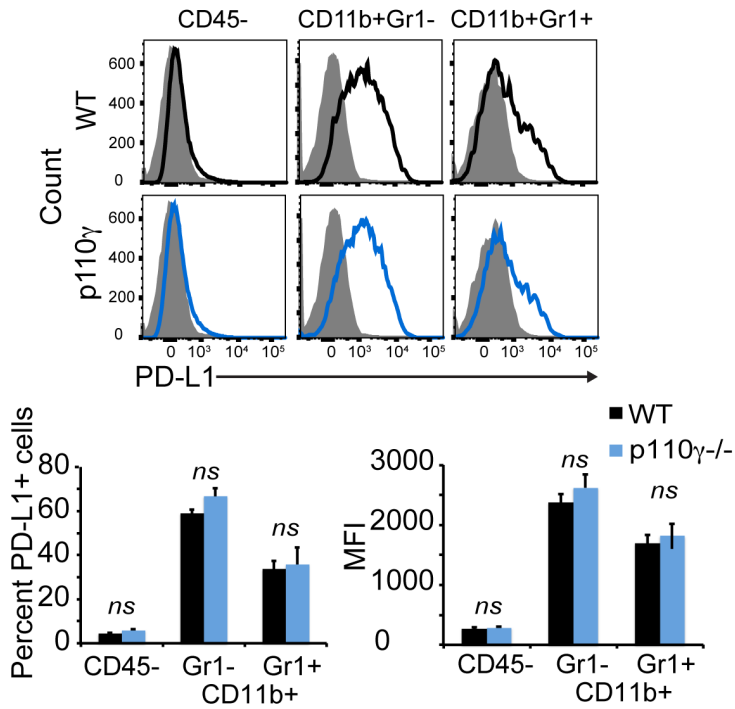

**C**

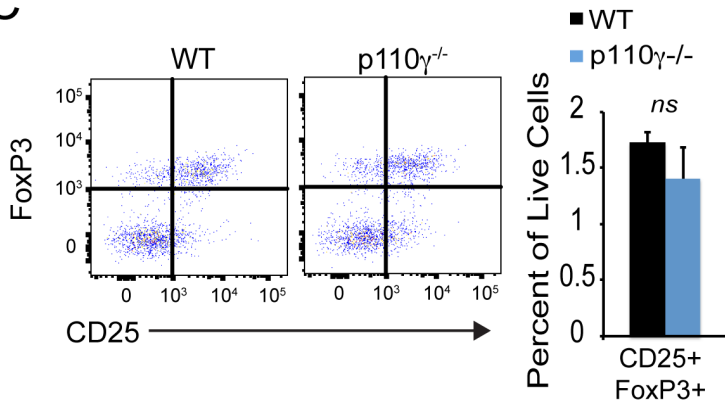

**D**

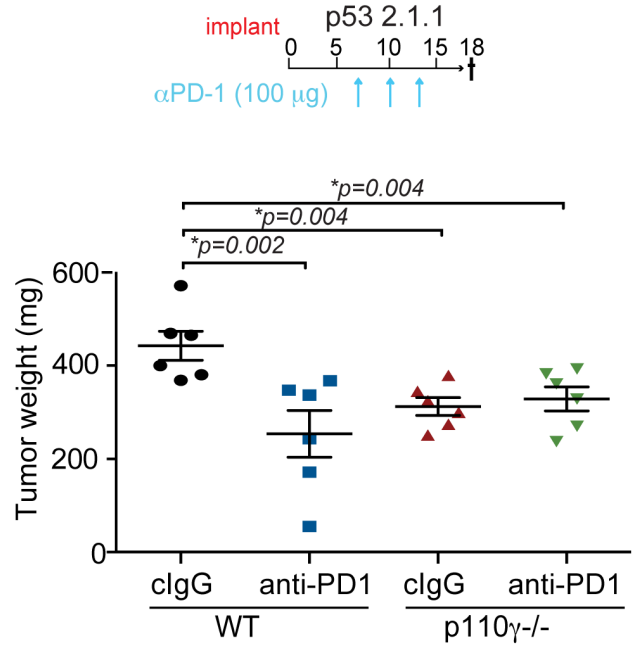

**E**

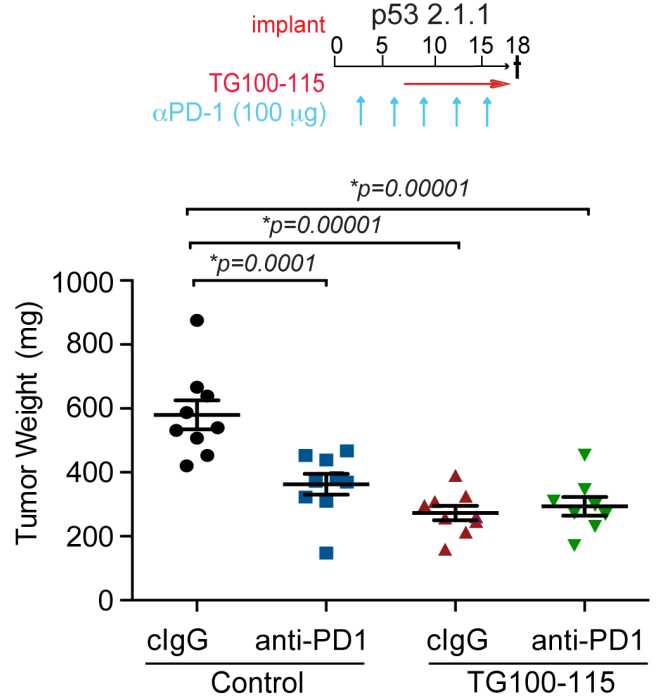

Supplement: NIHMS791787-supplement-7.pdf [file NIHMS791787-supplement-7.pdf]

# Supplementary Figure 7

**A**

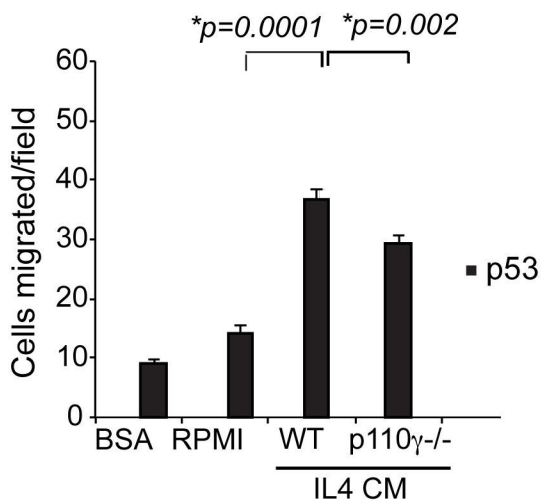

**B**

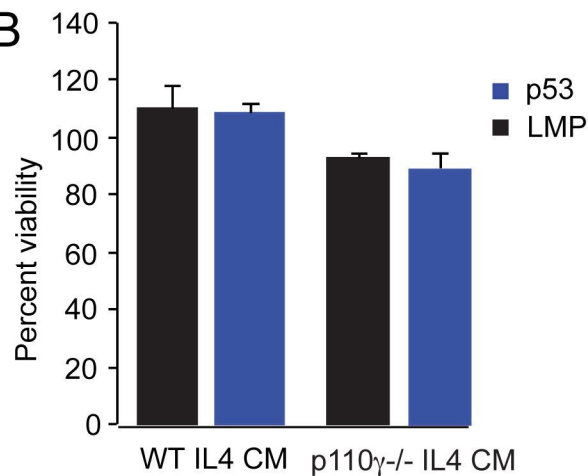

**C**

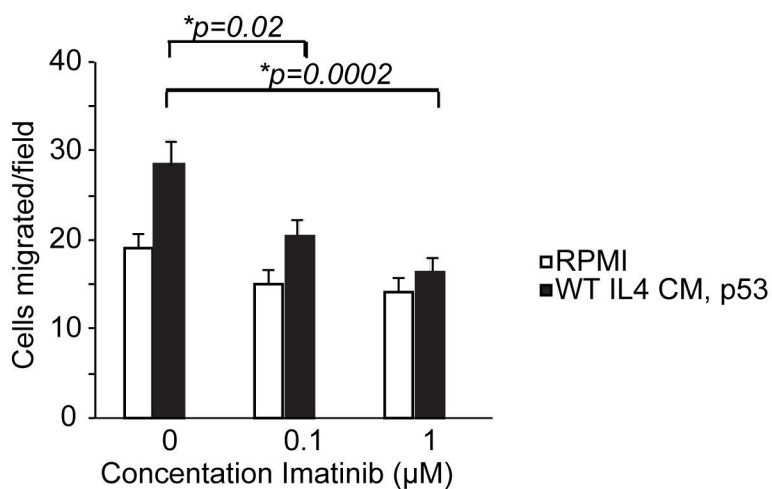

**D**

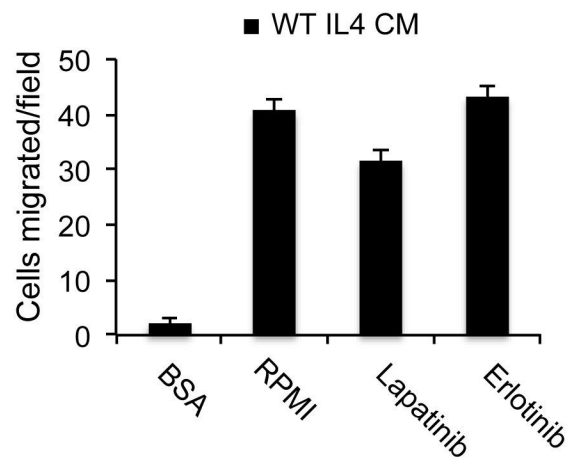

**E**

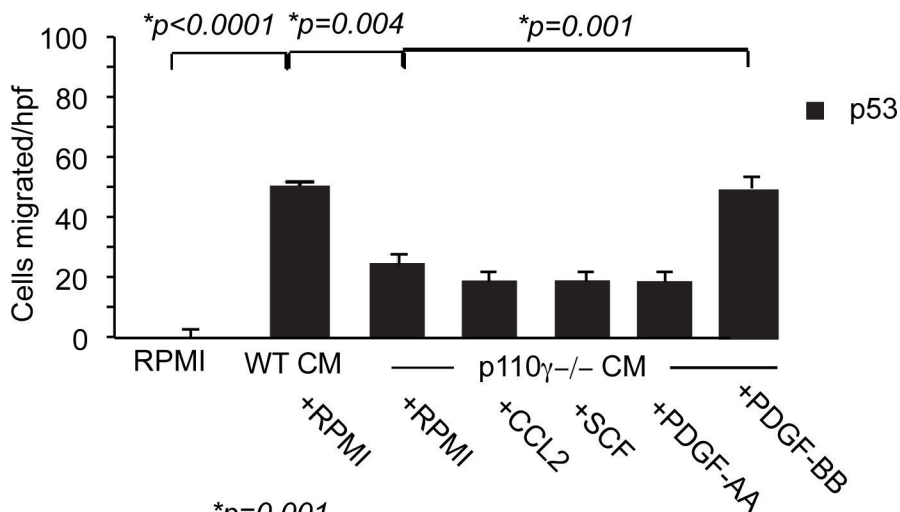

**F**

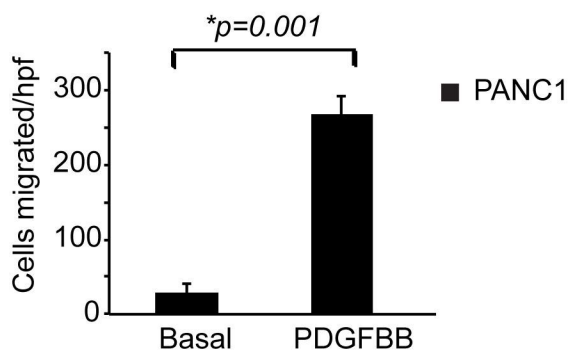

Supplement: NIHMS791787-supplement-8.pdf [file NIHMS791787-supplement-8.pdf]
